# Supplementary material for: Lipidation of Class IV CdiA Effector Proteins Promotes Target Cell Recognition during Contact-Dependent Growth Inhibition
Source: PubMed Central journal article supplement (PMC8510554; doi:10.1128/mbio.02530-21), 2021-10-12
Supplement: mbio.02530-21-sf001.pdf [file mbio.02530-21-sf001.pdf]

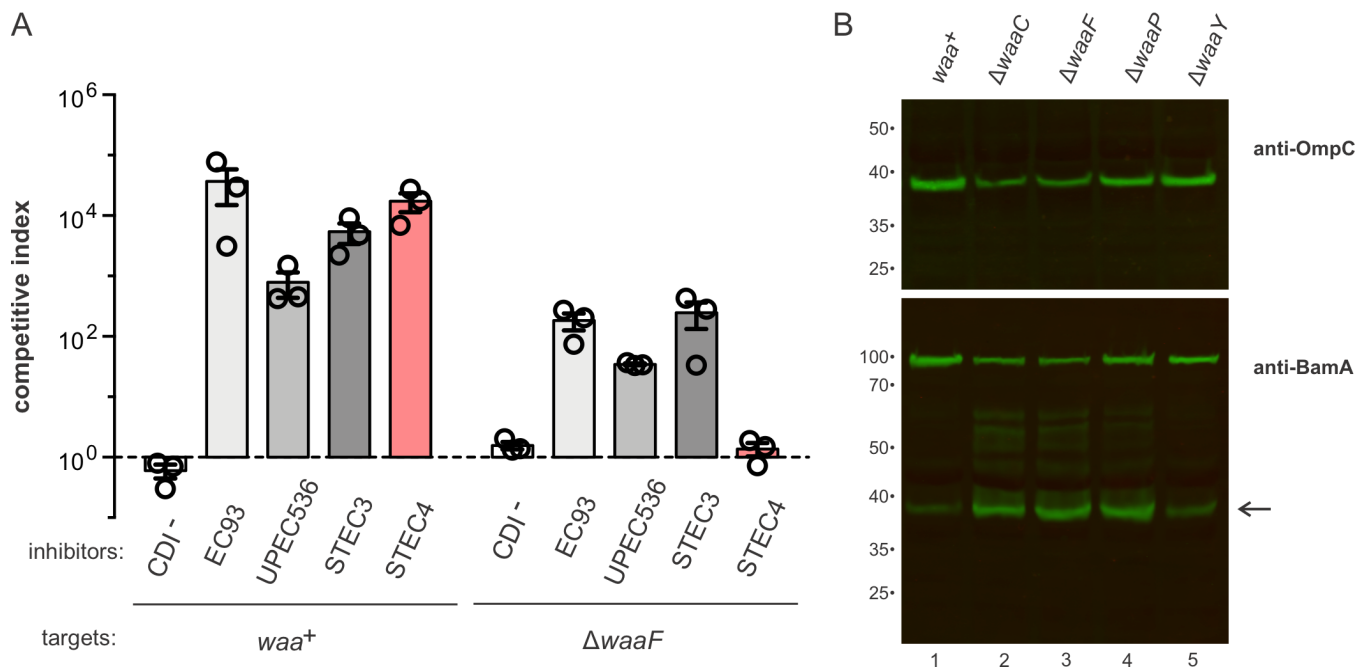

**Figure S1. *E. coli* deep-rough mutants are partially resistant to OMP targeting CdiA proteins. A)** Inhibitor strains expressing the indicated CDI systems were co-cultured at a 1:1 ratio with *E. coli* CH7175 (*waa*<sup>+</sup>) or CH13816 ( $\Delta waaF$ ) target cells on LB agar. The competitive index is the ratio of viable inhibitor to target cells after 3 h. Data are the average  $\pm$  SEM from three independent experiments. **B)** Total urea-soluble protein was isolated from the indicated *waa* backgrounds for immunoblot analysis using polyclonal antibodies to OmpC and BamA. The arrow indicates an apparent BamA degradation product that accumulates in deep-rough mutant backgrounds.
