# Supplementary material for: Lipidation of Class IV CdiA Effector Proteins Promotes Target Cell Recognition during Contact-Dependent Growth Inhibition
Source: PubMed Central journal article supplement (PMC8510554; doi:10.1128/mbio.02530-21), 2021-10-12
Supplement: mbio.02530-21-sf002.pdf [file mbio.02530-21-sf002.pdf]

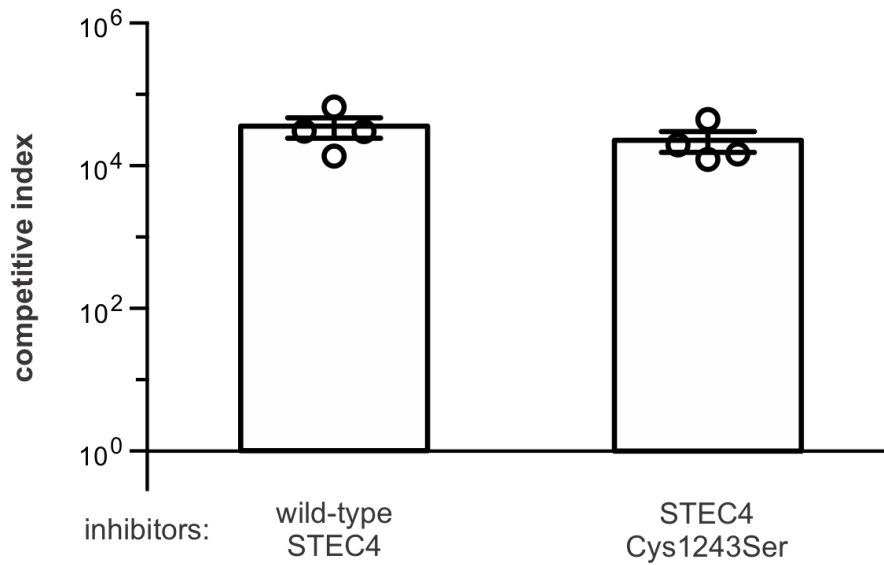

**Figure S2. The Cys1243Ser substitution has no effect  $CdiA^{STEC4}$  growth inhibition activity.**

Inhibitor cells expressing wild-type  $CdiA^{STEC4}$  or the Cys1243Ser variant were co-cultured at a 1:1 ratio with *E. coli* CH7175 (*waa*<sup>+</sup>  $\Delta$ *wzb*) target cells on LB agar. The competitive index is the ratio of viable inhibitor to target cells after 3 h. Data are the average  $\pm$  SEM from four independent experiments.
