# Supplementary material for: Lipidation of Class IV CdiA Effector Proteins Promotes Target Cell Recognition during Contact-Dependent Growth Inhibition
Source: PubMed Central journal article supplement (PMC8510554; doi:10.1128/mbio.02530-21), 2021-10-12
Supplement: mbio.02530-21-sf003.pdf [file mbio.02530-21-sf003.pdf]

EC93 AGDLSLRGKTLHTAGTTQGQNLTVQADRWANS**SVQATGNLTASATGQLTSTG DIMSQGD** 802  
 STECO31\_IV **GGDVSNQEGTL**-----**AAGRDLNAHLNVLENQOGTVVSNGN** 805  
 .\*\*\*: \* : \*\* \* :\*. \* . . \* :\*\*\*:

EC93 **TTLNAATTDNRGSLLS-AGTSLDGNSLDNS**GTVQGNHVTIRQNGVTNSG**TLTGIAALTL** 861  
 STECO31\_IV **SRLDVTRFDNQGGRLVAQOQLTSLSTDI**-----**INDASGLIQSGASLNLRADTL** 854  
 : \*.: : \*\*:\* . \* :\*:\*..... :. \* :\*\*\*: .: \* \*\*

EC93 **AARMDMASQPALMNNNGSLLTSGDLTITAGSLANSGAIQA-ADSLTARLTGELVSTAGS** 920  
 STECO31\_IV SNR-----NSGDRG**GVISQGPMTLNAGTLDSTAGVLLSGDAL--SLTAGVVNNTSG** 903  
 : \* .: \*.:\*\*\*: \* :\*:\*:\* \* :...: .\*: \* \*\* .: \*.....

EC93 **KVTSNGEMALSALNLSNSGQWIAKNLTLKANSLTSAGDITGVDALTLTVNQTLNNHASGK** 980  
 STECO31\_IV **QVVANGLLG**-----**WNSQALNNQSG**-----**LIQGRGISINTAGQTLDN-RRGT** 945  
 :\*.:\*\* :. \* : : \* . :. \* \* . \*..\*\*\*:\* \*.

EC93 **LLSAGVLTALKADSVKNDGQLQGNATTITAGQLTNGGHLQGETLTLAASGGVNNRSGGVLM** 1040  
 STECO31\_IV **LNSLQELTVSTGAMDNRG**-----**GTVGAKTTADLSTTSLDNREGGRLV** 988  
 \* \* \*\*:.:\*\*\*: \* \* : : \* : : : :.\*\*\*.\* \* :

EC93 **SRNALNVSTATLSN-QGTIQGGGGVSLNATDRLO--NDGKILSGSNLTLTAQ-----VLA** 1092  
 STECO31\_IV **SEGELRLHTGGLQNSHQIQSVGDMLLNSVRGVVDNVSGLIRSGSAITLNALQFINRHTQ** 1048  
 \*.. \*.: \* . \*.\* : \* \*\* . \*.: \*\*\*: : . \* \* \*\*\* :\*\*\*.\*

EC93 **NTGSGLVQAATLLLDVNVTVNGGRLVATGSADV-KGTT-LNNTGTFQ-GADLLVN--YHT** 1147  
 STECO31\_IV **NTQOGLEAQTIIHITTQDLNQEGSILADRALTVMADRTLSNNDGVLSSGATLSVSGRQLA** 1108  
 \*\*\*.\* : : : \* :\*\* : \* . \* \*\* \*.: \*\* \* \* . :

EC93 **FSNSGTLGTSGLGVKGSLLQNGTGRLYSAGNLLLD-AQDFSGQGQVATGDVTLKLI** 1206  
 STECO31\_IV **FSNRDGVVK-AGQSVSVDAGQLGGDGKLLSLGNMMLKSNTTFSNSGQTIANGNLTLVNG** 1167  
 \*\*\* . : : \* \* . . : . \* \*\* \* \* \*\* : \* . \*\*..\*\*\*:\*\*\*:\*\*\*: .

EC93 **ALTNHGTLAAGKTLVTSQNAVTT--NGVMOGDAMVLGAGEFTNNGTLTAGKNSV---** 1261  
 STECO31\_IV **DVSNTGSLLAGSRLDLNSIRLENTEKGEISAGQ-TWLVNTDTLLNRGLID-GKYTRLQAN** 1225  
 : \* \* : \* \* . \*.: \* . . : \* : \* : \*.. : : \* \* : \* \* . :

EC93 -----**FSAQRLFLNAPGSLQAGGDVSLNRSRDI**TISGFTGT-**AGSLTMNVAGTLL**-----**NSA** 1313  
 STECO31\_IV **TLTNSGTGRIYGDVGVCAA**-----**TFNNLEENGVAATLAGRERVDLGVQTLNNRTHS** 1278  
 .: \*\*\*: \* \* \* : : : . \*.: \* \* \*\* : : . \* . :

EC93 **LIYAGNNLKLFTDRLHNQ**HGDILAGNSLWVQKDSSTG-----ANSEIINRSGNIETTRGD 1368  
 STECO31\_IV **LIYS**-----**AGDMHTGMLDANGAATGKAGVLNNHSATIEAAGYLVLVLSAGQ** 1324  
 \*\*\*: \*\* : \* . \* . : :\*. : \* \* : \* : : \* :

EC93 **ITMNTAHLNLSWDAISASHEVIPGSSHGVISPVPENNRWWGVVR-----HDGVEYLAVYW** 1423  
 STECO31\_IV **INNVNDHF**-----**TTERVVVSTEKVTEYQLSGSDKRWSAGEPGVYVDNDSSNSLKKLH** 1377  
 \* . \* : : : : \* : . . . :\*\*\* . : \* . : \*

EC93 **-GKGAT-VPDEYRIRTDGTETVTVSASGHAARISGGADMHIRAGRLDNEASFILAGGMT** 1481  
 STECO31\_IV **TPEGARDKFTQYDYTR-TVEE-TRVKESDPGKILSGAGMTIVADKLLNDKSQVVAGLLT** 1435  
 :\*\* : \* . \* . . . : \* .\*\*\* \* \* \* : \* : \* : \* : \* :

EC93 **LSGDTLNNQGWQEGTTGKETVWRLASGSLPKAWFTEPWYKVYRQVSPDAT-EASGTSPAG** 1540  
 STECO31\_IV **IPSGSVENVSVSG**-----**ERH**-----**VTDSGTSTYYRIRKKGKDKQGEKTSQYTPPT** 1483  
 : .:\*\*\*: . . :. : : : : \* : : : . . : \* \* : \*

EC93 **QYRAVISAAGDVSASFATDTGNTTVMPRAGGAGNTITVPSLNSLTPP--TVSQGVSGEAL** 1598  
 STECO31\_IV VIQTITLKPGE~~LTSH~~-----GQ--VQSHV~~TLS~~---PLKPQGT~~DVQTGLTGNVD~~ 1527  
 ::: \*:::: : \*. ::: \*. \* \*::::.

EC93 **LNESGTG--ITGPVW~~N~~DALPDTLKDIPGALSLSGASVSSYPLPSGNNGYFVPSTDPDPSY** 1656  
 STECO31\_IV ATVAGTDRIP~~LRPVVSAGEP~~--VILLPGQ-----Q-FEVSAPQGSIHVAGP~~DTR~~----- 1573  
 . :\*. \*\* . . \* : :\*. . . \*.\* \*.\*

EC93 LITVNP~~KL~~DGLGKV~~D~~SSLFAGLYD~~LL~~RMQ~~P~~GEAP~~RE~~TD~~P~~AYT~~D~~EKQ~~F~~LGSSY~~I~~LDR~~L~~GLK 1716  
 STECO31\_IV -----LP~~D~~SSL~~F~~K-----TNPA~~V~~NV~~P~~YL~~V~~ET~~D~~PR~~F~~T~~N~~Q~~K~~T~~W~~L~~G~~S~~D~~Y~~M~~Q~~K~~A~~F~~S~~Q~~N 1617  
 \*\*\*\*\* \*\*\*\*\* :\*::\* :\*:\*.\*: . . :

EC93 PEKDYR~~F~~L~~G~~DA~~A~~F~~D~~TRY~~V~~SN~~V~~IL~~N~~Q~~T~~GS~~R~~Y~~I~~NG~~T~~GS~~D~~LA~~Q~~M~~K~~Y~~L~~M~~D~~S~~A~~A~~A~~Q~~Q~~K~~A~~L~~G~~L~~T~~F~~G~~ 1776  
 STECO31\_IV G~~D~~N~~M~~L~~K~~R~~L~~G~~D~~G~~F~~Y~~E~~Q~~R~~L~~I~~R~~E~~Q~~V~~V~~A~~L~~T~~G~~R~~Y~~L~~D~~G~~Y~~S~~N~~D~~E~~E~~Q~~F~~K~~A~~L~~M~~D~~A~~G~~I~~A~~F~~G~~K~~Q~~Y~~N~~L~~T~~P~~G 1677  
 :: : \*\*. :: \* : : : \*\*.\*\*\*:\* ..\* \*\*: \* \* \* : \* \* . \* \*

EC93 VSLTAG~~Q~~V~~A~~Q~~L~~TR~~S~~LL~~W~~ES~~V~~TIN-----G~~Q~~T~~V~~M~~V~~P~~K~~LY~~L~~S~~P~~E~~D~~I~~T~~L~~H~~-NG~~S~~V~~I~~S~~G~~N~~N~~V~~Q~~ 1830  
 STECO31\_IV VAL~~T~~A~~E~~Q~~M~~ALL~~T~~G~~D~~I~~V~~W~~L~~V~~N~~T~~T~~V~~T~~L~~P~~D~~G~~S~~T~~Q~~T~~V~~Q~~V~~P~~Q~~V~~Y~~A~~R~~V~~K~~P~~G~~D~~V~~N~~S~~A~~G~~A~~L~~I~~A~~G~~R~~D~~M~~V~~ 1737  
 \*:\*\*\* \*\*: \* \* . : \* . . \* . \* \* \* \* : : : \* : \* : \* : \* :

EC93 -LAG~~N~~I~~T~~NS~~G~~SS~~I~~NA~~Q~~N~~D~~LL~~L~~L~~D~~R~~T~~GS~~I~~D~~N~~L~~N~~AG~~L~~I~~N~~AG~~G~~A~~L~~N~~L~~K~~A~~I~~G~~D~~I~~G~~N~~ISS~~V~~IS~~G~~K 1889  
 STECO31\_IV MK~~L~~D~~G~~D~~L~~F~~N~~S**GKLAGKQ**-----**TVQLS-AENIHNQAGTIQGA** 1773  
 .\*:: \*\*. . \* : : \* . : \* \* : \* \* : . \* . \*

EC93 TV~~S~~L~~E~~S~~A~~T~~G~~N~~I~~S~~N~~L~~T~~R~~T~~E~~Q~~W~~A~~M~~N~~N~~G~~Y~~N~~H~~F~~S~~G~~T~~D~~T~~G~~P~~L~~A~~A~~V~~R~~A~~T~~D~~S~~L~~F~~M~~G~~A~~A~~G~~D~~I~~S~~I~~T~~G~~A~~A 1949  
 STECO31\_IV **NVSL**-----**TARTDINSTGGL** 1789  
 .\*\*\* \* \*\* . \*\* .

EC93 VS~~A~~G~~D~~S~~V~~LL~~A~~A~~G~~N~~D~~L~~N~~M~~N~~A~~I~~Q~~A~~G~~E~~R~~R~~R~~Y~~GG~~S~~G~~W~~Y~~E~~T~~H~~A~~V~~A~~P~~-----TV~~T~~A~~G~~N~~S~~L~~M~~L~~S~~A~~G~~R 2004  
 STECO31\_IV **LQATDSLLAMAGRDISLTTTTTRTAQRDAGQ-NHFERTRIDSVAGVYVQNDQGRVLVQAGR** 1848  
 :.\* \*\*:\* \*\*.\*: . : : \* \* . : \* : . . . \* : \* . \* \*

EC93 DV~~N~~S~~Q~~A~~A~~G~~I~~T~~A~~E---NS~~M~~D~~I~~R~~A~~G~~R~~D~~V~~N~~M~~A~~A~~E~~S~~T~~G~~A~~G~~D~~H~~D~~S~~T~~F~~S~~M~~--K~~T~~V~~H~~**DSVRQOQGTDM** 2059  
 STECO31\_IV **DMNLTAATVVNQKDSLQLSAGRDMTLSTVTTSAQDNI-TWDKNNRLSQVTSQSTGSL** 1907  
 \*\*: \* \* . : . : : \* \* \* : : \* \* \* : \* : : . . . \* : :

EC93 **TSGGDITVTAGRDI~~T~~SVATAV~~T~~TAKGDIRV~~N~~AGHDIV~~L~~GTATES**-----**DYHYSESGETRNR** 2115  
 STECO31\_IV **AGNGDVTLTAGRDMTSAASLSAQKGLALMAGHDVTLTGAQNTSSLDEYHKVT**---GSSG 1964  
 :. . \* \* : \* \* \* \* \* \* \* \* \* \* : : : \* \* \* : \* \* : : \* \* .

EC93 **LLSHQ~~T~~TRTITEDSV~~T~~TREK~~S~~LLSG~~N~~R~~V~~TV~~N~~AG~~N~~N~~L~~TV~~Q~~SD~~V~~V~~A~~DR~~D~~V~~S~~LA~~A~~D~~N~~H~~V~~D~~V~~L** 2175  
 STECO31\_IV M~~L~~S~~K~~T~~T~~T~~T~~T~~H~~D~~V~~S~~D~~R~~R~~T~~M~~T~~G~~S~~E~~L~~N~~G~~D~~T~~V~~S~~I~~G~~A~~G~~H~~N~~L~~N~~V~~T~~G~~S~~S~~V~~A~~G~~D~~N~~R~~V~~S~~L~~V~~A~~G~~N~~N~~L~~N~~I~~G~~ 2024  
 : \* \* : \* \* . . \* \* \* \* : : \* \* \* \* \* \* \* \* \* \* \* \* \* \* \* \* \* \* : :

EC93 **AATSTDT~~S~~WR~~F~~K~~E~~T~~K~~T~~S~~G~~L~~T~~G~~T~~G~~G~~I~~G~~F~~T~~T~~G~~S~~S~~K~~T~~T~~H~~D~~R~~R~~E~~A~~G~~T~~T~~Q~~S~~Q~~S~~A~~S~~T~~I~~G~~S~~T~~A~~G~~N~~V~~S** 2235  
 STECO31\_IV M~~L~~T~~E~~S~~N~~R~~E~~T~~H~~L~~K~~Q~~E~~K~~K~~S~~G~~L~~M~~S~~S~~G~~V~~G~~F~~S~~V~~G~~S~~Q~~S~~L~~K~~V--**RDTATDTTQKGSTVGSVHG~~D~~V** 2082  
 \* . : : . : \* \* \* . \* \* \* \* \* \* \* \* \* \* \* \* \* \* \* \* \* \* \* \* \* \* \* \*

EC93 **ITAG~~Q~~A~~H~~I~~S~~G~~S~~D~~V~~I~~A~~N~~R~~D~~I~~S~~I~~T~~G~~S~~V~~V~~V~~D~~P~~G~~H~~R~~R~~T~~V~~D~~E~~K~~F~~E~~Q~~K~~S~~G~~L~~T~~V~~A~~L~~S~~G~~A~~V~~G~~S~~A** 2295  
 STECO31\_IV **LQAGNRLTVNGSDLIAGRDMALSGKEVSI~~T~~A~~A~~T~~D~~Q~~H~~V~~Q~~T~~H~~T~~V~~E~~Q~~K~~T~~S~~G~~L~~T~~L~~A~~L~~S~~G~~T~~V~~G~~S~~A~~** 2142  
 : \* \* : : . \* \* \* \* \* \* \* \* \* \* \* \* \* \* : . \* : . . \* \* \* \* \* \* \* \* \* \* \* \*

EC93 IN~~N~~A~~V~~T~~M~~A~~R~~E~~A~~K~~E~~T~~S~~D~~S~~R~~L~~A~~A~~L~~K~~G~~T~~Q~~A~~V~~L~~S~~G~~V~~Q~~A~~G~~V~~N~~---H~~G~~L~~Q~~Q~~Q~~S~~A~~D~~P~~N~~N~~G~~I~~G~~V~~S~~I~~S~~L~~ 2352  
 STECO31\_IV L~~N~~T~~T~~V~~E~~T~~V~~Q~~A~~A~~K~~S~~A~~G~~N~~S~~R~~L~~E~~A~~L~~Q~~G~~V~~K~~A~~A~~L~~S~~G~~A~~Q~~A~~V~~Q~~A~~G~~R~~L~~A~~D~~A~~Q~~G~~A~~D~~A~~G~~N~~N~~N~~T~~V~~G~~I~~S~~L~~S~~Y~~ 2202  
 : \* : \* . : \* \* . : \* \* \* \* \* \* \* \* \* \* \* \* \* \* . \* . \* \* \* \* : \* : \*

EC93 NHQOSKSETKYQHDIVSGSTLSAGNNVSVTATGKNKDHNNSGDMLITGSQIKSGNDTSLN 2412  
 STECO31\_IV GSQSSKSEQOSEQTVAKGSTLTAGNNLSIQATGSGVK-GVDGDLTIQGSQIKAGNNVLLQ 2261  
 . \*.\*\*\*\*\* : :: :..\*\*\*\*\*:\*\*\*\*\*:\*. \*\*.. . . .\*\* : \* \*\*\*\*\*:\*\*\*. \*:

EC93 AQNDILLAAAADTRQTTGKNSSKGGVGVVSGGGTNGGGLSIFAGINGSEGREKNGTTW 2472  
 STECO31\_IV ANRDVNLVSAENTSKLEGKNTSSGGVGVGVGVSGGWGISVSASANQKGSEKNGTTH 2321  
 \*:.\*: \*.:\* :\* : \*\*\*:\*.\*\*\*.\*\*\*..\* \*:.\* \*\*\*: \*. \* .:\* \*\*\*\*\*

EC93 TETTLDAGKNVSLTSGRDTTLLSGAQVSGEKVTADVGNLTISSLQSDRYDSRQNRVAAG 2532  
 STECO31\_IV TETTVDAGNRLTIISGRDTTLLTGAQAGGETVKVDAGRHLTLTSEQSDRYDSKQONASAG 2381  
 \*\*\*\*\*:\*\*\*:..::: \*\*\*\*\*:\*\*\*..\*\*\*..\*\*\*..\*\*\*:\*\*\*:\* \*\*\*\*\*:\*\*\*:..:\*\*\*

EC93 GSFTFGSMGSGYASISQDKIKSNYDSVREQSGIYAGKDGFDVTVGNHTQLNGAVIASTA 2592  
 STECO31\_IV GSFTFGSMGSSASVNLRSRDKMHSNYDSVQEQTGIFAGRGGFDVTTGQHTQLNGAVIASTA 2441  
 \*\*\*\*\*:\*\*\*. .:\*:\*\*\*:\*\*\*\*\*:\*\*\*:\*\*\*:\*\*\*:\*\*\*\*\*.\*:\*\*\*\*\*:\*\*\*\*\*

EC93 TDDKNSLNTNTLWSDIHNQADYKASHTGISLGGSGMSASQMVASNAIAGAANALTGMS 2652  
 STECO31\_IV TADKNRLDTGTGLGFSDIENRADFKTEHQAGLSTGGSV-----AGNFLGNMANNLLVGA 2495  
 \* \*\*\* \*:\*.\*\*\*\*\*:\*\*\*.\*:\*\*\*:\*. \* . \*\* \*..: \*.\* :.. \*\* \* :

EC93 GSSGHAEGTTSSAISGNNLIIRNKESQKQDIAGLSRDPENANGSIAPIFDREKEQKRLQE 2712  
 STECO31\_IV NHEGHADSTTQSAVSAGNITIRDTKSQKQDVADLNRDAAHANQTLSPIFDREKEHQRLQO 2555  
 . .\*\*\*:\*.\*\*\*:\*.\*\*\*: \*\*:.\*\*\*\*\*:\*.\*\*\* \*\* :\*\* :\*:\*\*\*\*\*:\*\*\*:

EC93 AQVISQISQMSNIVMTYGETEAMKAARKEHPGMSDA-----QLRETPEY 2757  
 STECO31\_IV AOLIGEIGNQVADIARTEGQIAGEKAKRDPAA-LNQARAELEAAGKPFTEQDVAQRAYNN 2614  
 \*\*:\*:\*.\*\*\*:\*\*\*. \* \*: . \*\* \* . ::\* : : :

EC93 REVMKGYGTGSTPQMVVQAITGVLGGLNAGNPGQVLGGLNPAVAQLIKQATGD----- 2811  
 STECO31\_IV GMAASGFGTGKQYQAIQAATAAVQGLAGGNLSAALAGGAAPYLAEVVKTMTTDPVTGEV 2674  
 . .\*:\*\*\*. \* .:\* \*\* \*..: \*\* .\*\* . \*\*\*\*\* \* :\*:\*\*\* \* \*

EC93 NREANLMAHAVWGALAAQLGGNNAASGAAGAFSGELAARYIIDNYYGGRTDNLSQEERQO 2871  
 STECO31\_IV NKAANVTAHAVVNAALAVAQGNALAGAAGAATGEMVG-MIATQMYGKSVSGLSETEKOT 2733  
 \*: \*\* : \*\*\*\* .\* \* \*\*\*\*\* :\*\*\*\*\* :\*\*\*:.. \* : \*\* ...\*\*\* \*:

EC93 ISMLATIASGIAGGLVGNSTSAAGTGAQAGRNSVENNAMSGLGFGTGFQSYVQAQEAALV 2931  
 STECO31\_IV LSTLATVAAGLAGGLVGNSSGASAVAGAQSCKTTIENNSMSGLVPPRVQDA-----SLA 2787  
 :\* \*\*\*:\*\*\*:\*\*\*\*\*:\*\*\* :\*\* :\*\*\*:\*\*\*:..:\*\*\*:\*\*\*\*\* . : : :\*.

EC93 NNTNLTDKNGKVLNPNATPEEIKYASDKLVTGSIPEGQDPARGLLISWGAGASVFGGELIA 2991  
 STECO31\_IV FDPSQO---GK-----SAEEISDA-----IGASHMGPSWGTTYKV---HPIV 2823  
 : . \*\* : \*\*\*. \* \* : \*\*\*: .\* . \*.

EC93 PAVGTVAVIGGTLGTTDAVKQFLTLKPEQYSTTDTLIAAGEGGLTQKGKVFSTFIN 3051  
 STECO31\_IV QAGGDVSFIRGYTLNGTIDDN--HISVNOQDIYSIGA----HGGASLGLSFGPYFPGLIN 2877  
 \* \* \*:.\* \* \*.\*\*\* \* .:\*\*\*: \*\* \*\* \* ..\* . \* \* :\*\*

EC93 TMGAYLG-SKAKGEDPTGPMVGNALGALGNKAGDKFTKEMLSRFGSVTSEVTGT-VTG 3109  
 STECO31\_IV TNNNDYSINGGFGVGS-----GITMG-KDGVSTFTG-VGPSWGSATEIKGVDVNG 2927  
 \* . . . \* . : \* :\*\* \* \* .\*\* :. .:\* :\*\*\*:\*. \*\*

EC93 SVIGTVTDYQIEKLGKGNKEGAK 3132  
 STECO31\_IV TSTNEIYRYDFK----- 2939  
 : . : \* : :

**Figure S3. Alignment of class I CdiA<sup>EC93</sup> and class IV CdiA<sup>STEC4</sup> effector proteins.** The amino acid sequences of CdiA<sup>EC93</sup> (AAZ57198.1) and CdiA<sup>STEC4</sup> (WP\_001081258.1) were aligned using Clustal Omega at <http://www.uniprot.org>. Domains and peptide motifs are outlined as determined by the NCBI Conserved Domains sequence analysis site. Pink bold-face indicates the Sec-dependent signal peptide; green indicates the hemagglutinin activity domain (Pfam: PF05860); blue indicates FHA-1 peptide repeats (Pfam: PF05594); orange indicates FHA-2 peptide repeats (PF13332), yellow indicates the pre-toxin-VENN domain (PF04829); and purple indicates the variable CdiA-CT toxins. The receptor-binding domain of CdiA<sup>EC93</sup> is shown in black bold-face. CdiA<sup>STEC4</sup> residues Cys1243 and Lys1467 are rendered in red bold font.
