# Supplementary material for: Lipidation of Class IV CdiA Effector Proteins Promotes Target Cell Recognition during Contact-Dependent Growth Inhibition
Source: PubMed Central journal article supplement (PMC8510554; doi:10.1128/mbio.02530-21), 2021-10-12
Supplement: mbio.02530-21-sf004.pdf [file mbio.02530-21-sf004.pdf]

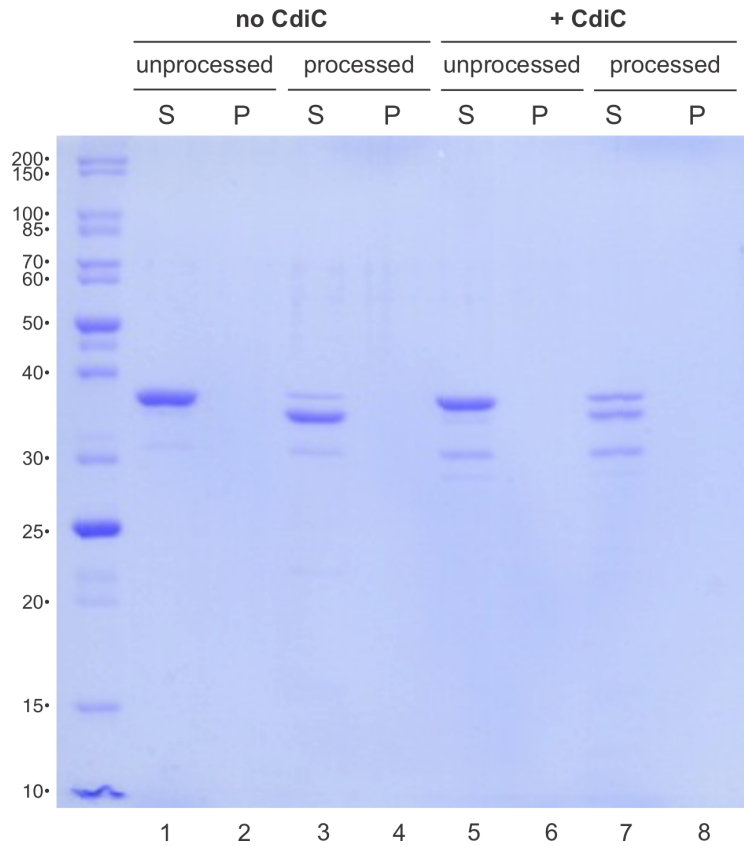

**Figure S4. RBD<sup>STEC4</sup>-His<sub>6</sub> remains soluble after cell-dependent N-terminal proteolytic cleavage.** Unlipidated (no CdiC) and lipidated (+ CdiC) RBD<sup>STEC4</sup>-His<sub>6</sub> were incubated with *E. coli waa*<sup>+</sup> cells to induce N-terminal processing, then the processed proteins were re-isolated by Ni<sup>2+</sup>-affinity chromatography under denaturing conditions. After buffer exchange into sodium phosphate, processed and unprocessed proteins were centrifuged at 199,000 ×g for 5 min into supernatant (S) and precipitate (P) fractions for SDS-PAGE analysis.
